# Supplementary material
Source: publisher figshare collection journal article supplement (https://karger.figshare.com/articles/dataset/_/5121319)
Supplement: Supplementary file 1 [file 1]

Archive with 2 entries (2 files):
- 000318777_sm_Video1.avi
- 000318777_sm_VideoNote.pdf
