# Supplementary material
Source: publisher figshare collection journal article supplement (https://karger.figshare.com/articles/dataset/_/5121319)
Supplement: Supplementary file 1 [file 1 › 000318777_sm_VideoNote.pdf]

**Online supplemental video.** The video clip shows the basic experiment where deoxygenated RBC mixture is being added to the cremaster muscle. Time has been speeded up by a factor of 4. The film was recorded through a low magnification objective to get a general picture of the effects of this intervention. Note the arteriole entering the picture from the top, bifurcating and thus forming an upside down Y. It is supplying the capillary bed in the lower right corner of the picture where the deoxygenated RBC mixture is applied. At first it is constricted and barely visible, then after 20-30 seconds with hypoxia it dilates and becomes clearly black.
